# Supplementary material for: Carrier-free nanomedicines self-assembled from palbociclib dimers and Ce6 for enhanced combined chemo-photodynamic therapy of breast cancer
Source: Royal Society of Chemistry journal article supplement (doi:10.1039/d2ra05932k), 2023-01-01
Supplement: d2ra05932k1.pdf [file d2ra05932k1.pdf]

## Supporting information

### **Carrier-free Nanomedicines Self-Assembled from Palbociclib Dimers and Ce6 for Enhanced Combined Chemo-Photodynamic Therapy of Breast Cancer**

Zheng Huang<sup>a, b</sup>, Huaisong Hu<sup>a</sup>, Tong Xian<sup>a</sup>, Zhigang Xu<sup>a</sup>, Dianyong Tang<sup>a</sup>, Bochu Wang<sup>b</sup> and  
Yimei Zhang<sup>a, b</sup>\*

<sup>a</sup> *National & Local Joint Engineering Research Center of Targeted and Innovative Therapeutics, Chongqing Key Laboratory of Kinase Modulators as Innovative Medicine, College of Pharmacy & International Academy of Targeted Therapeutics and Innovation, Chongqing University of Arts and Sciences, Chongqing 402160, China;*

<sup>b</sup> *Key Laboratory of Bio-theological Science and Technology of Ministry of Education, College of Bioengineering, Chongqing University, Chongqing, 400045, China*

\* Corresponding authors: yimeizhang@cqwu.edu.cn (Y.-M. Zhang)

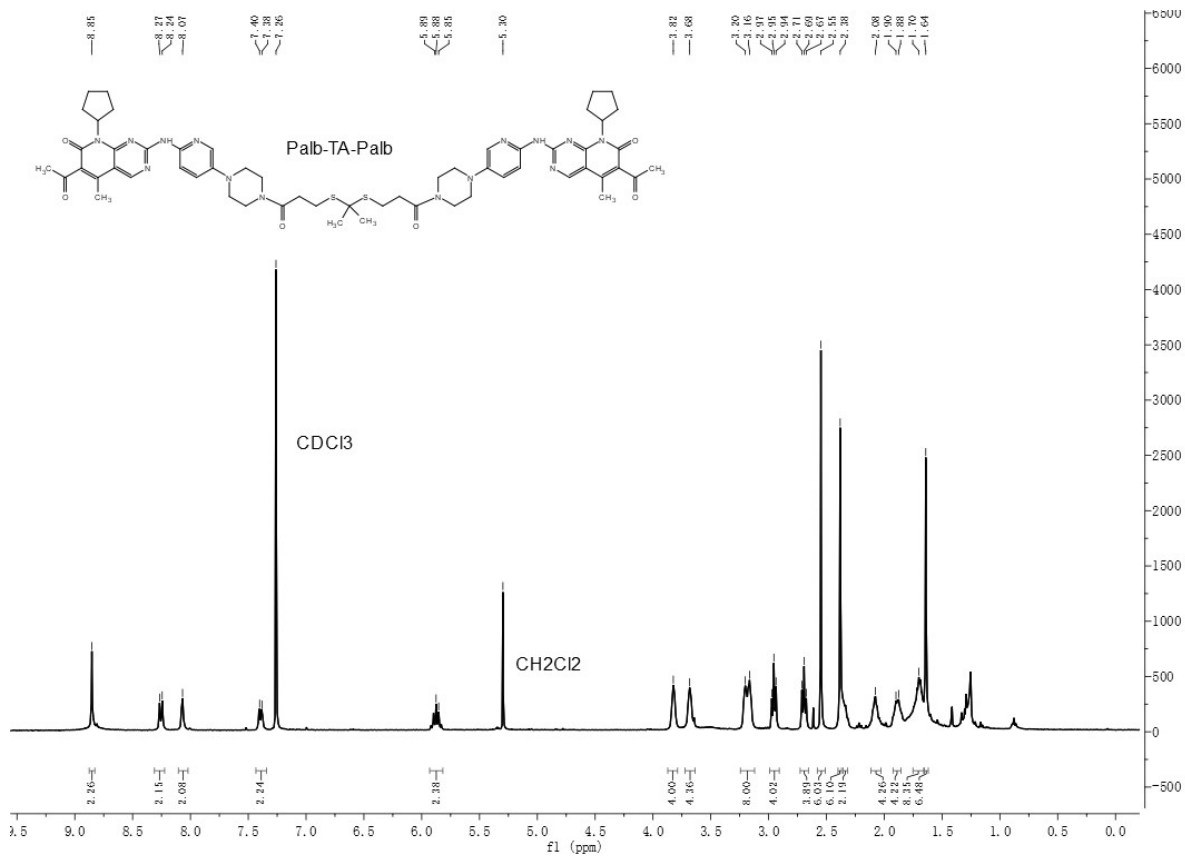

**Fig. S1** The  $^1\text{H}$  NMR spectrum of Palb-TA-Palb.

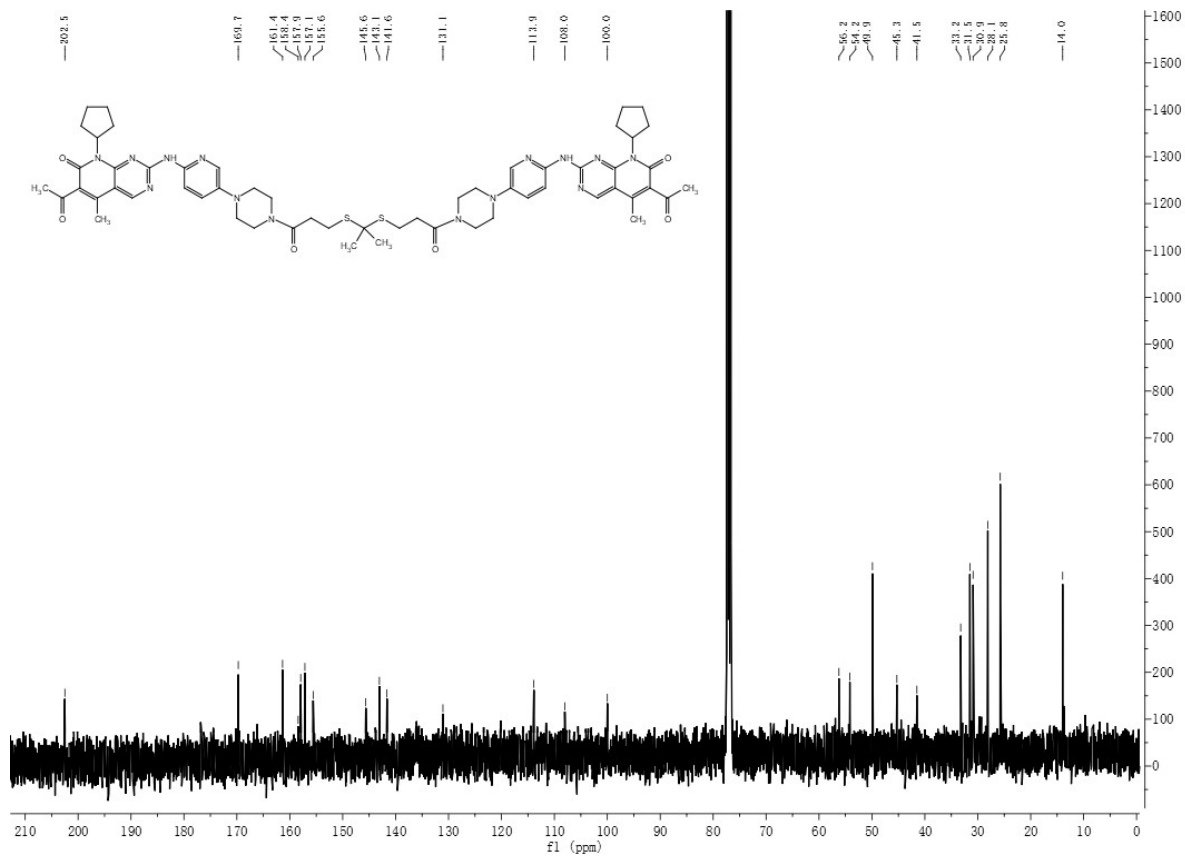

**Fig. S2** The  $^{13}\text{C}$  NMR spectrum of Palb-TA-Palb.

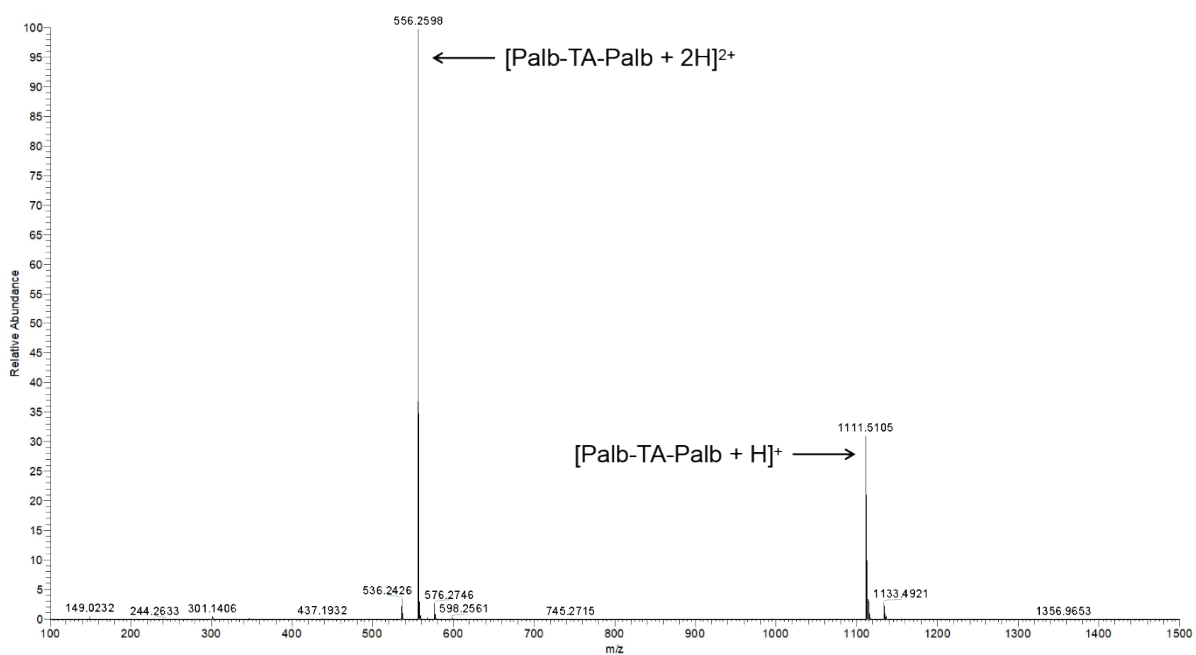

**Fig. S3** The mass spectrum of Palb-TA-Palb.

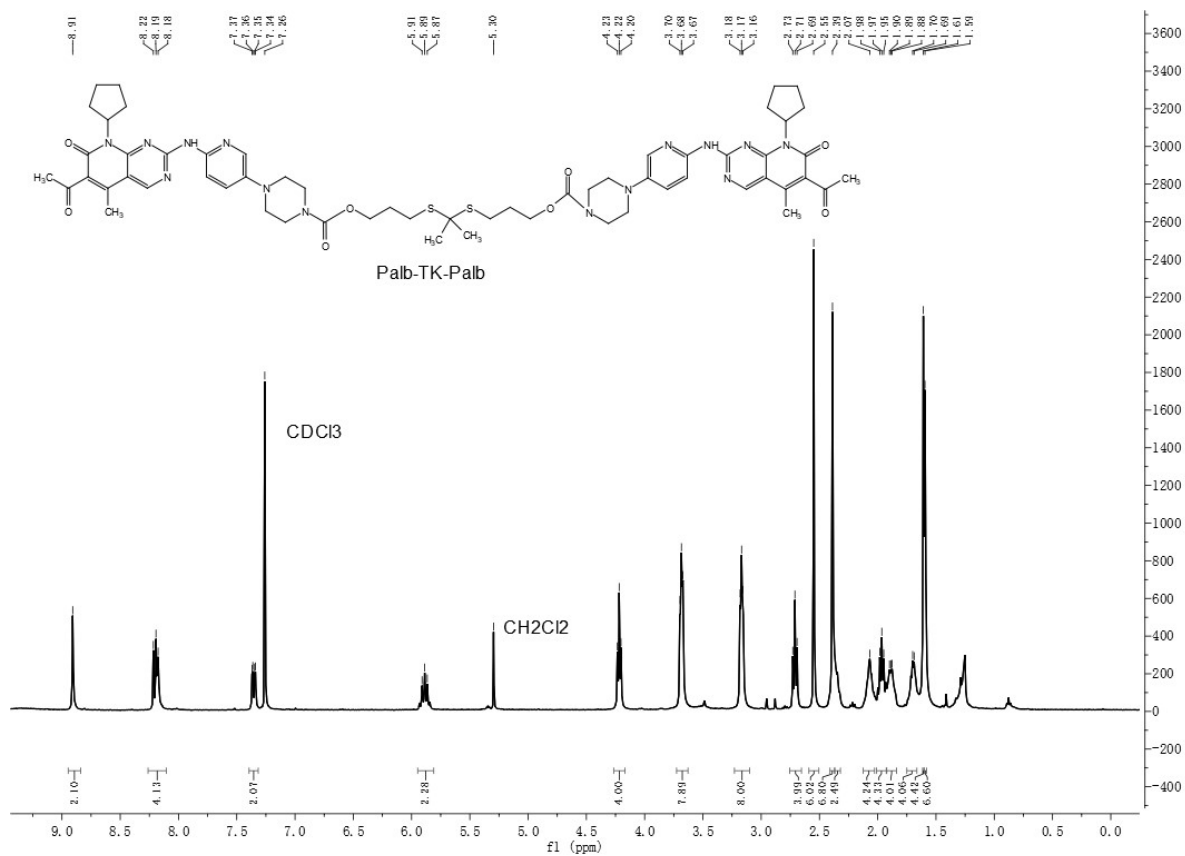

**Fig. S4** The  $^1\text{H}$  NMR spectrum of Palb-TK-Palb.

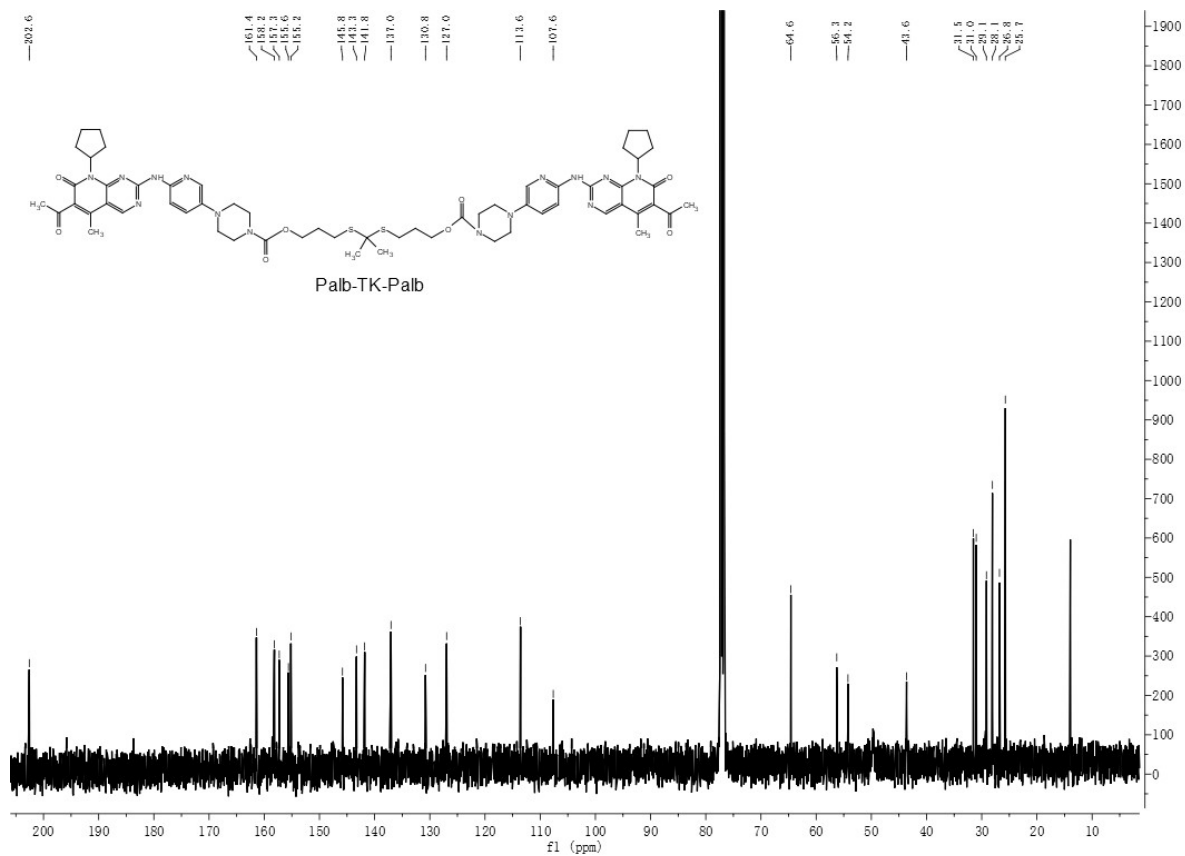

Fig. S5 The  $^{13}\text{C}$  NMR spectrum of Palb-TK-Palb.

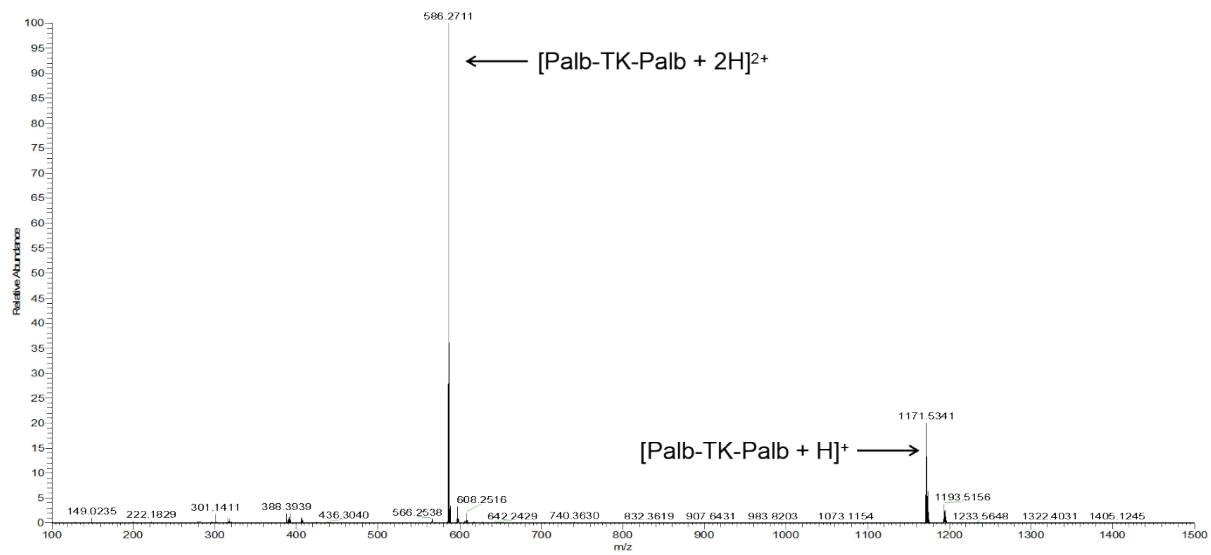

Fig. S6 The mass spectrum of Palb-TK-Palb.

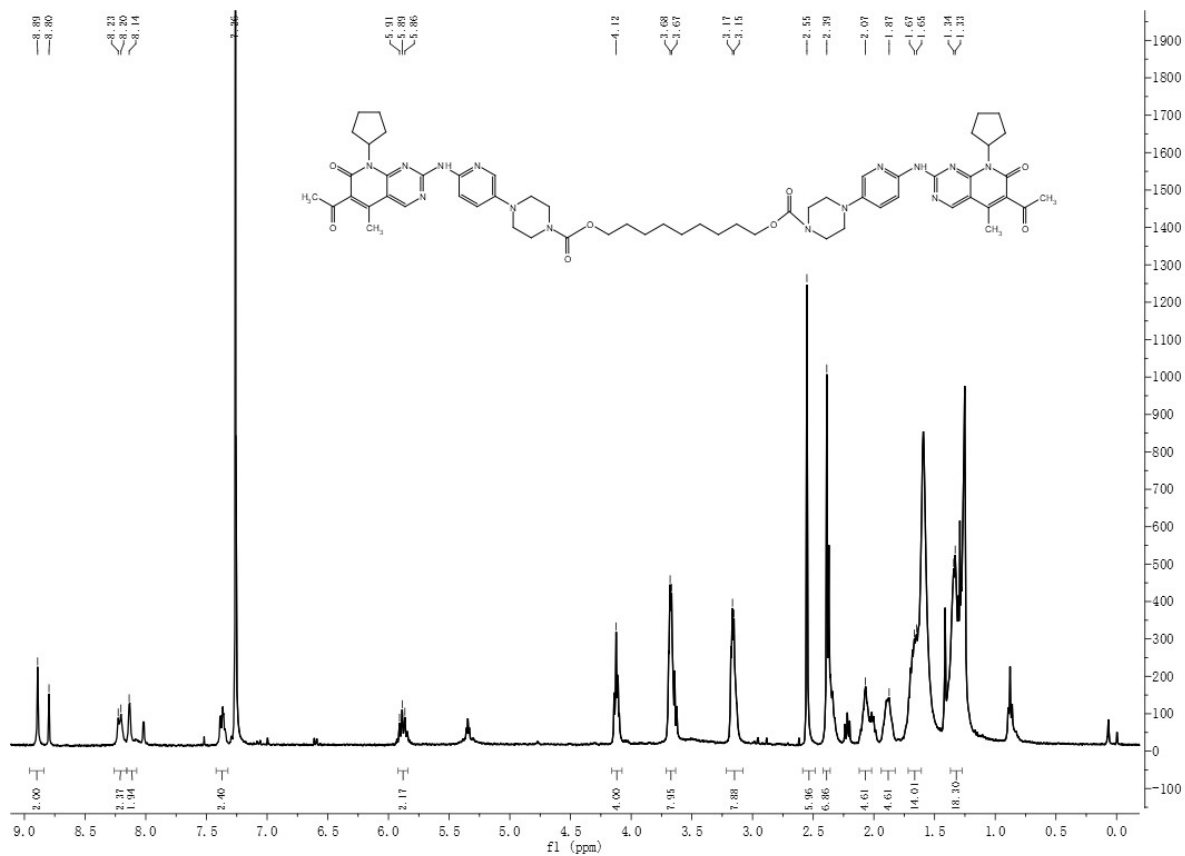

**Fig. S7** The  $^1\text{H}$  NMR spectrum of Palb-CC-Palb.

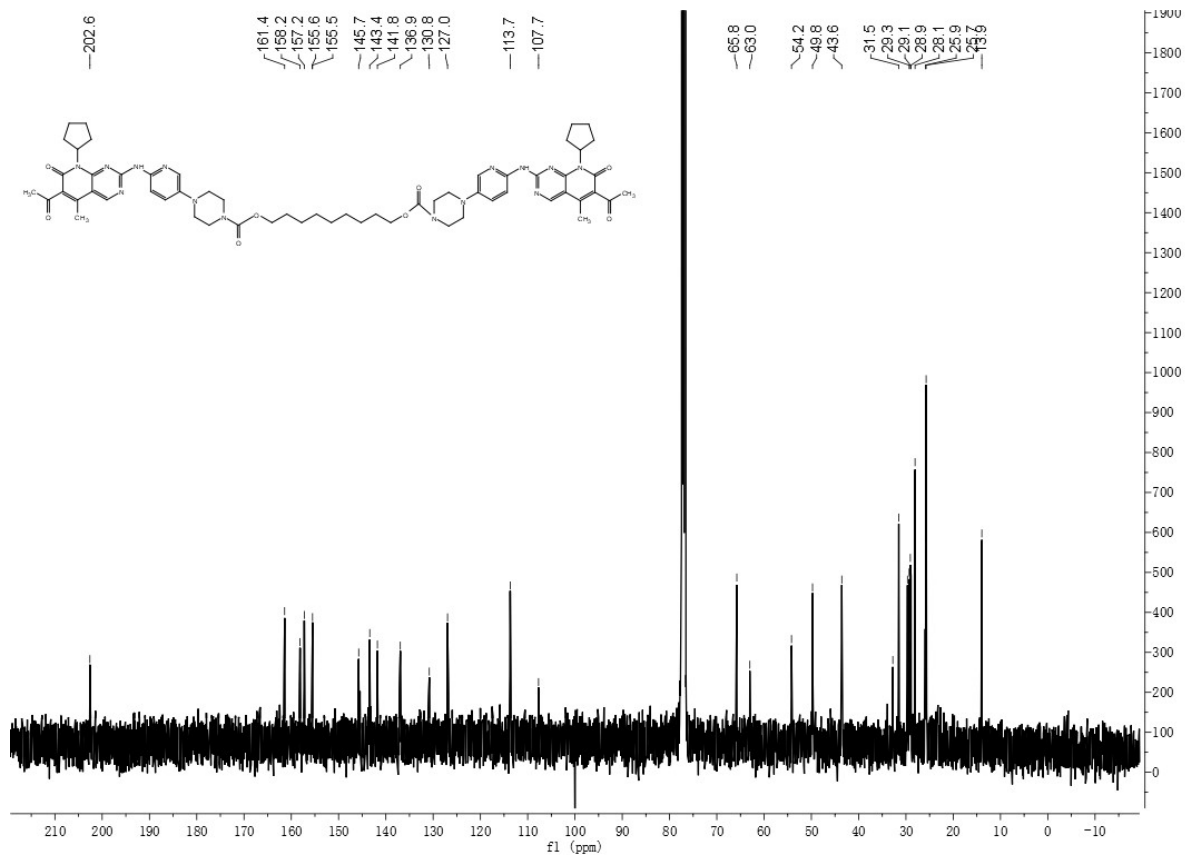

**Fig. S8** The  $^{13}\text{C}$  NMR spectrum of Palb-CC-Palb.

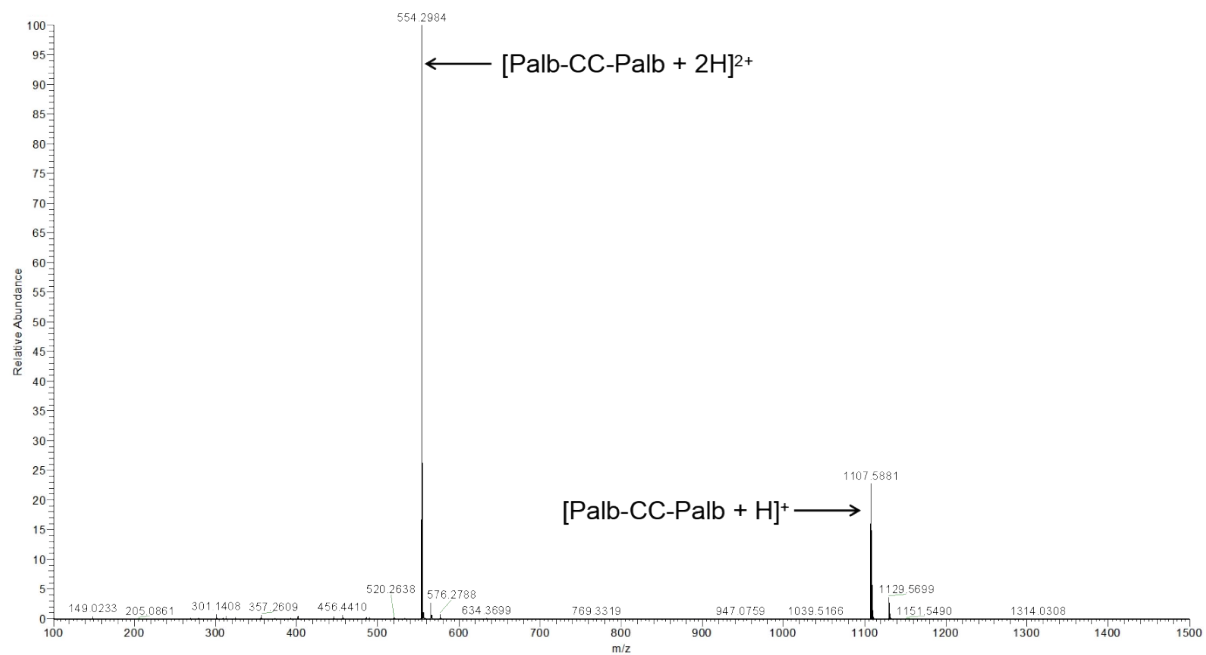

**Fig. S9** The mass spectrum of **Palb-CC-Palb**.

**Table S1.** Size, PDI and Count Rate of **TPP-TK-PPa** NPs with different weight content of DSPE-PEG2000

| Samples                 | NP-1 | NP-2 | NP-3  | NP-4  | NP-5  | NP-6  | NP-7  |
|-------------------------|------|------|-------|-------|-------|-------|-------|
| Content of DSPE-PEG2000 | 0    | 10%  | 15%   | 20%   | 25%   | 27.5% | 30%   |
| Size (nm)               | -    | -    | 165.3 | 223.4 | 140.0 | 69.4  | 172.5 |
| PDI                     | -    | -    | 0.318 | 0.231 | 0.295 | 0.212 | 0.264 |
| Count rate (kcps)       | -    | -    | 211   | 238   | 293   | 295   | 222   |

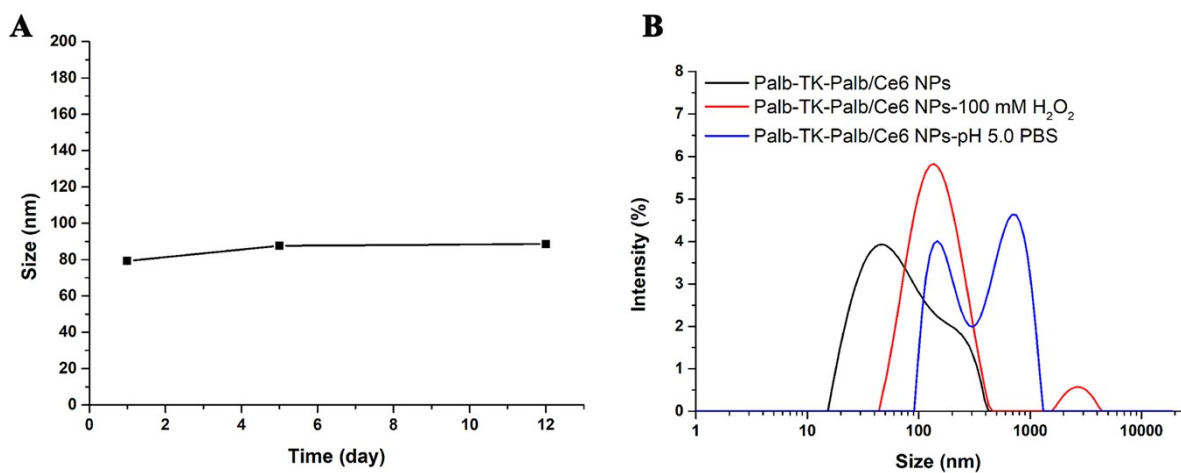

**Fig. S10** (A) Mean particle sizes of **Palb-TK-Palb/Ce6 NPs** at different time points. Data represent mean  $\pm$  SD (n = 3). (B) The size distribution of **Palb-TK-Palb/Ce6 NPs** treated with 100 mM H<sub>2</sub>O<sub>2</sub> or pH = 5.0 PBS for 48 h.

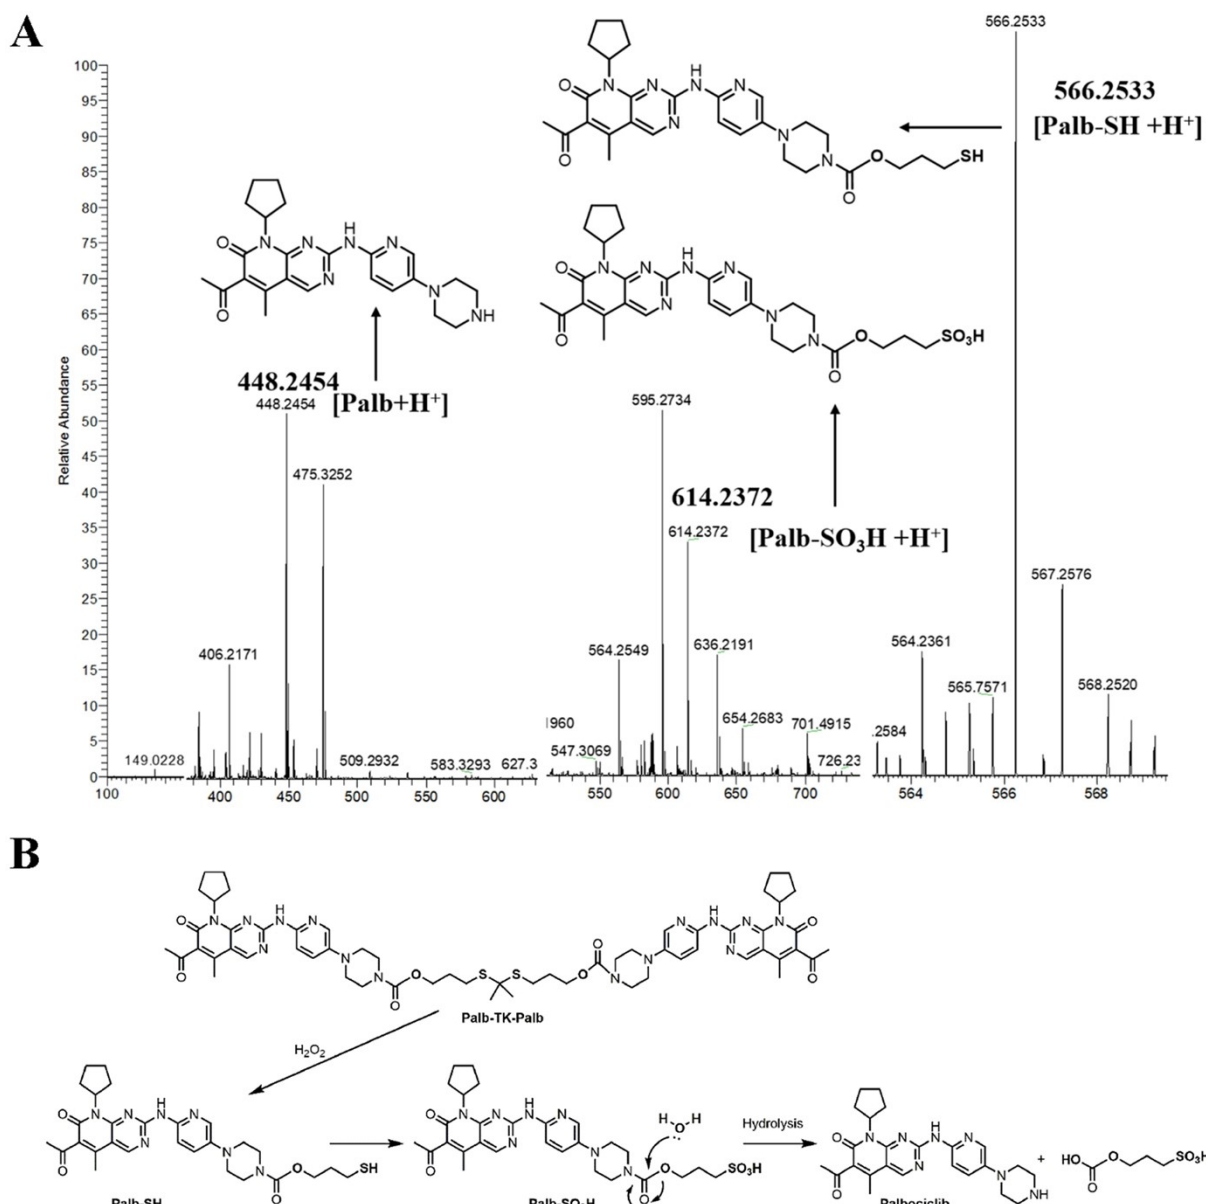

**Fig. S11** The combined HR-MS (ESI) of **Palb-TK-Palb** after after 200 mM H<sub>2</sub>O<sub>2</sub> incubation for 48 h (A). The proposed light-triggered degradation mechanism of **Palb-TK-Palb** (B).

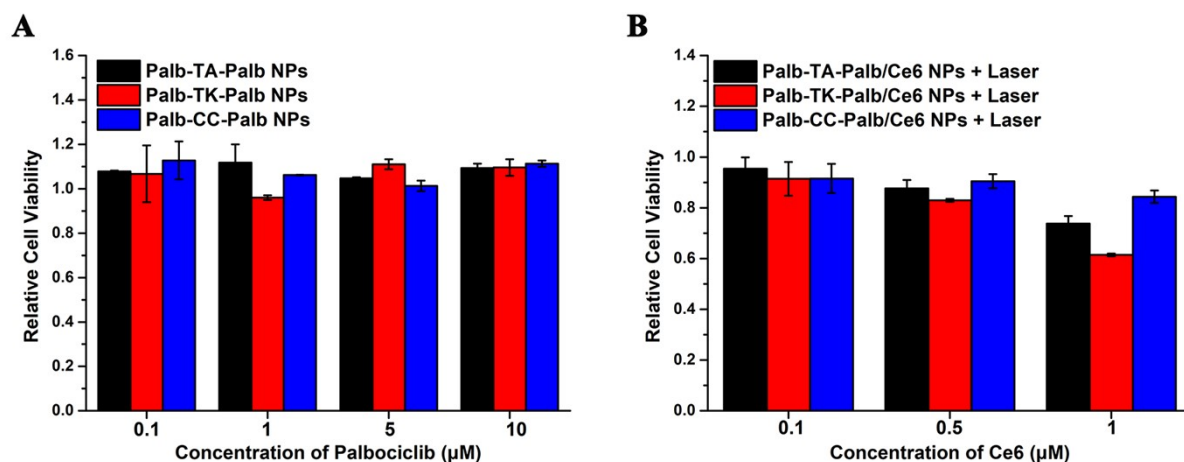

**Fig. S12** Cytotoxicity of various formulations against MDA-MB-231 cells without (A) and with (B) 660 nm laser irradiations (20 mW/cm<sup>2</sup>, 1 min) after incubation for 24 h.

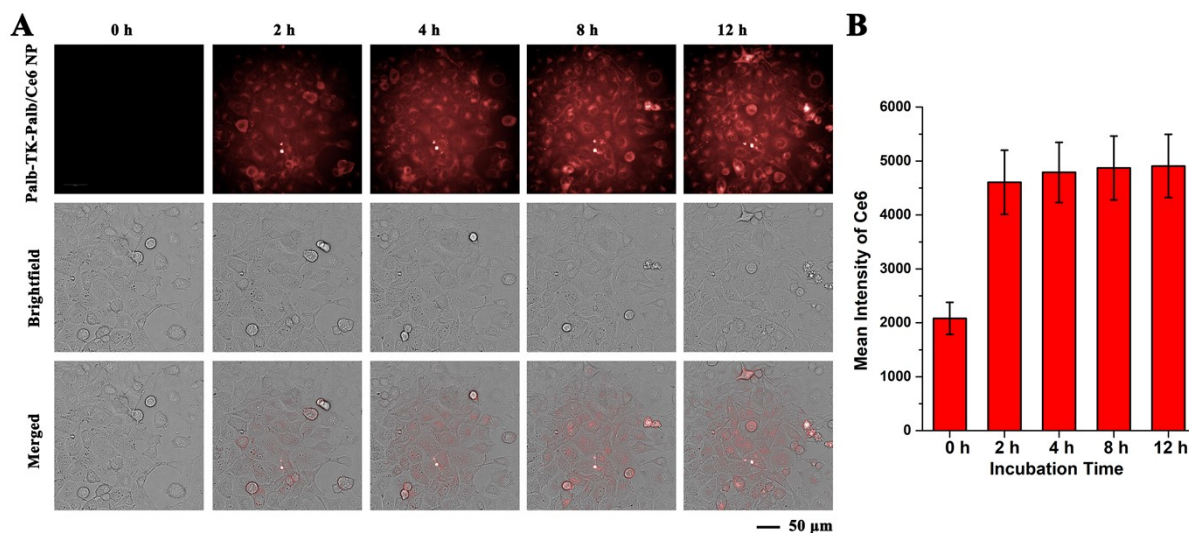

**Fig. S13** In vitro cellular uptake ability of **Palb-TK-Palb/Ce6** NPs for different time. The images (A) and the relative intensity (A) of Ce6 were studied by high content analysis system-operetta CLS<sup>TM</sup>.



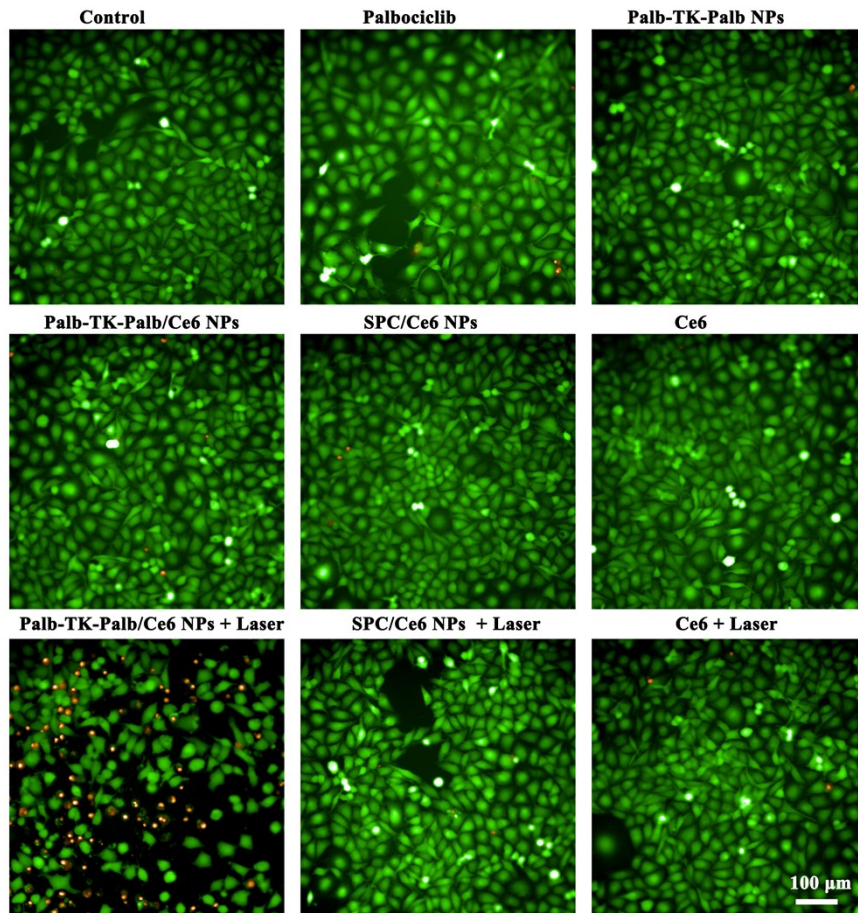

**Fig. S14** The live/dead staining of MDA-MB-231 cells treated with different formulations. Calcein-AM was used to stain live cell (green). PI was used to stain dead cells (yellow).
